# Supplementary material for: Hydrogen Sulfide Exerted a Pro-Angiogenic Role by Promoting the Phosphorylation of VEGFR2 at Tyr797 and Ser799 Sites in Hypoxia–Reoxygenation Injury
Source: MDPI journal article supplement (doi:10.3390/ijms25084340), 2024-04-14
Supplement: s1 [file s1]

# **SUPPLEMENTARY**

# **MATERIALS**

**Hydrogen Sulfide Exerted a Pro-Angiogenic Role by Promoting the Phosphorylation of VEGFR2 at Tyr797 and Ser799 Sites in Hypoxia–Reoxygenation Injury**

**Sen Zhang et al.**

A

VEGFR2 Y797

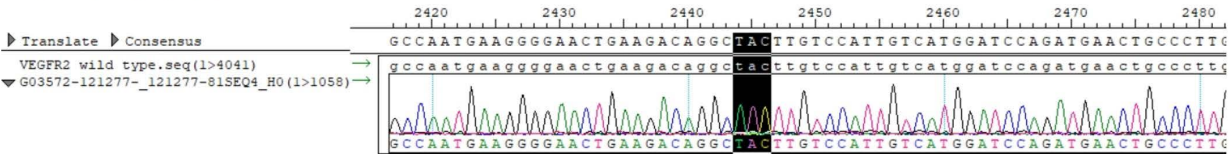

B

VEGFR2 Y797F

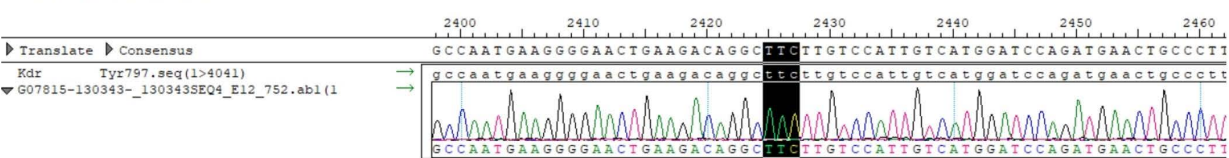

C

VEGFR2 S799

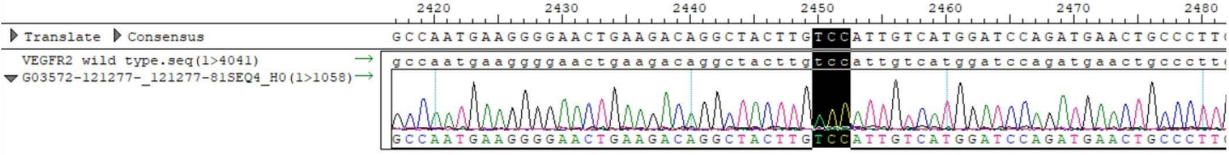

D

VEGFR2 S799A

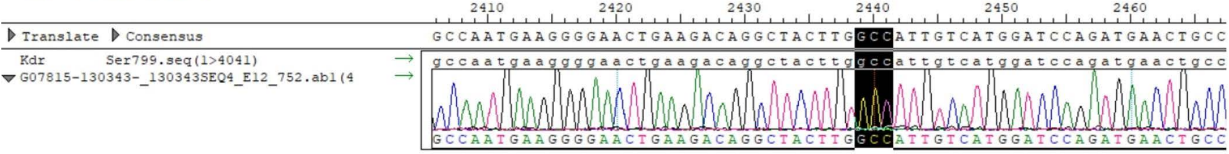

**Figure S1:** The plasmid sequencing results.

(A): The sequencing result of VEGFR2<sup>Y797</sup>.

(B): The sequencing result of VEGFR2<sup>Y797F</sup>.

(C): The sequencing result of VEGFR2<sup>S799</sup>.

(D): The sequencing result of VEGFR2<sup>S799A</sup>.
