# Supplementary material for: Hydrogen Sulfide Exerted a Pro-Angiogenic Role by Promoting the Phosphorylation of VEGFR2 at Tyr797 and Ser799 Sites in Hypoxia–Reoxygenation Injury
Source: Int J Mol Sci. 2024 Apr 14;25(8):4340. doi: 10.3390/ijms25084340 (PMC11050214; doi:10.3390/ijms25084340)
Supplement: Supplementary file 1 [file ijms-25-04340-s001.zip › Recombinant Protein Identification Results.xlsx]

## Sheet: Rat
Protein IDs	Majority protein IDs	Peptide counts (all)	Peptide counts (razor+unique)	Peptide counts (unique)	Protein names	Gene names	Fasta headers	Number of proteins	Peptides	Razor + unique peptides	Unique peptides	Sequence coverage [%]	Unique + razor sequence coverage [%]	Unique sequence coverage [%]	Mol. weight [kDa]	Sequence length	Sequence lengths	Q-value	Score	Intensity	MS/MS count	Peptide sequences	Only identified by site	Reverse	Potential contaminant	id	Peptide IDs	Peptide is razor	Mod. peptide IDs	Evidence IDs	MS/MS IDs	Best MS/MS	Oxidation (M) site IDs	Oxidation (M) site positions	Taxonomy IDs
P63259;P60711;P63269;P68136;P68035;P62738	P63259;P60711;P63269;P68136;P68035;P62738	4;4;4;4;4;4	4;4;4;4;4;4	4;4;4;4;4;4	Actin, cytoplasmic 2;Actin, cytoplasmic 2, N-terminally processed;Actin, cytoplasmic 1;Actin, cytoplasmic 1, N-terminally processed;Actin, gamma-enteric smooth muscle;Actin, alpha skeletal muscle;Actin, alpha cardiac muscle 1;Actin, aortic smooth muscle	Actg1;Actb;Actg2;Acta1;Actc1;Acta2	sp|P63259|ACTG_RAT Actin, cytoplasmic 2 OS=Rattus norvegicus OX=10116 GN=Actg1 PE=1 SV=1;sp|P60711|ACTB_RAT Actin, cytoplasmic 1 OS=Rattus norvegicus OX=10116 GN=Actb PE=1 SV=1;sp|P63269|ACTH_RAT Actin, gamma-enteric smooth muscle OS=Rattus norvegicus OX=1	6	4	4	4	9.3	9.3	9.3	41.792	375	375;375;376;377;377;377	0	54.729	79331000	9	AGFAGDDAPR;EITALAPSTMK;IIAPPER;RGILTLK				31	0;6;18;48	True;True;True;True	0;6;18;48	0;1;9;28;65;66	0;1;11;30;31;32;33;70;71	1;11;32;70	3	325	-1;-1;-1;-1;-1;-1
P0DMW1;P0DMW0;P55063;P14659;P63018	P0DMW1;P0DMW0;P55063	4;4;2;1;1	4;4;2;1;1	3;3;1;0;0	Heat shock 70 kDa protein 1B;Heat shock 70 kDa protein 1A;Heat shock 70 kDa protein 1-like	Hspa1a;Hspa1l	sp|P0DMW1|HS71B_RAT Heat shock 70 kDa protein 1B OS=Rattus norvegicus OX=10116 GN=Hspa1b PE=2 SV=1;sp|P0DMW0|HS71A_RAT Heat shock 70 kDa protein 1A OS=Rattus norvegicus OX=10116 GN=Hspa1a PE=2 SV=1;sp|P55063|HS71L_RAT Heat shock 70 kDa protein 1-like OS=Ra	5	4	4	3	5.9	5.9	4.2	70.184	641	641;641;641;633;646	0	32.229	9952800	8	DNNLLGR;FGDPVVQSDMK;SAVEDEGLK;VEIIANDQGNR				16	3;11;49;61	True;True;True;True	3;11;49;61	4;14;67;68;69;83	4;5;16;72;73;74;75;76;90	5;16;74;90	2	87	-1;-1;-1;-1;-1
P63039	P63039	2	2	2	60 kDa heat shock protein, mitochondrial	Hspd1	sp|P63039|CH60_RAT 60 kDa heat shock protein, mitochondrial OS=Rattus norvegicus OX=10116 GN=Hspd1 PE=1 SV=1	1	2	2	2	3	3	3	60.955	573	573	0	14.376	5184200	5	VGEVIVTK;VTDALNATR				40	64;74	True;True	64;74	86;100;101;102	94;109;110;111;112	94;110			-1
P0C0S7;A9UMV8;Q64598;Q4FZT6;Q00728;P0CC09;P0C170;P0C169;P02262	P0C0S7;A9UMV8;Q64598;Q4FZT6;Q00728;P0CC09;P0C170;P0C169;P02262	1;1;1;1;1;1;1;1;1	1;1;1;1;1;1;1;1;1	1;1;1;1;1;1;1;1;1	Histone H2A.Z;Histone H2A.J;Histone H2A type 1-F;Histone H2A type 3;Histone H2A type 4;Histone H2A type 2-A;Histone H2A type 1-E;Histone H2A type 1-C;Histone H2A type 1	H2afz;H2afj;Hist2h2aa3	sp|P0C0S7|H2AZ_RAT Histone H2A.Z OS=Rattus norvegicus OX=10116 GN=H2az1 PE=1 SV=2;sp|A9UMV8|H2AJ_RAT Histone H2A.J OS=Rattus norvegicus OX=10116 GN=H2aj PE=2 SV=1;sp|Q64598|H2A1F_RAT Histone H2A type 1-F OS=Rattus norvegicus OX=10116 PE=3 SV=3;sp|Q4FZT6|H2	9	1	1	1	5.5	5.5	5.5	13.553	128	128;129;130;130;130;130;130;130;130	0	6.6275	20113000	5	HLQLAIR				1	14	TRUE	14	17;18;19;20;21;22;23;24	19;20;21;22;23;24;25;26	20			-1;-1;-1;-1;-1;-1;-1;-1;-1
Q6LED0;P84245	Q6LED0;P84245	2;2	2;2	2;2	Histone H3.1;Histone H3.3	H3f3b	sp|Q6LED0|H31_RAT Histone H3.1 OS=Rattus norvegicus OX=10116 PE=1 SV=3;sp|P84245|H33_RAT Histone H3.3 OS=Rattus norvegicus OX=10116 GN=H3-3b PE=1 SV=2	2	2	2	2	10.3	10.3	10.3	15.404	136	136;136	0	34.863	9933500	4	EIAQDFK;STELLIR				43	5;54	True;True	5;54	6;7;8;74	7;8;9;10;81	10;81			-1;-1
P62282	P62282	2	2	2	40S ribosomal protein S11	Rps11	sp|P62282|RS11_RAT 40S ribosomal protein S11 OS=Rattus norvegicus OX=10116 GN=Rps11 PE=1 SV=3	1	2	2	2	10.1	10.1	10.1	18.431	158	158	0	16.844	15948000	4	ILSGVVTK;VLLGETGK				35	25;70	True;True	25;70	35;95;96	40;103;104;105	40;104			-1
A7VJC2	A7VJC2	2	2	2	Heterogeneous nuclear ribonucleoproteins A2/B1	Hnrnpa2b1	sp|A7VJC2|ROA2_RAT Heterogeneous nuclear ribonucleoproteins A2/B1 OS=Rattus norvegicus OX=10116 GN=Hnrnpa2b1 PE=1 SV=1	1	2	2	2	2.3	2.3	2.3	37.477	353	353	0	12.457	59355000	3	KLFVGGIK;LFVGGIK				0	27;29	True;True	27;29	37;39;40	42;44;45	42;44			-1
P82995	P82995	1	1	1	Heat shock protein HSP 90-alpha	Hsp90aa1	sp|P82995|HS90A_RAT Heat shock protein HSP 90-alpha OS=Rattus norvegicus OX=10116 GN=Hsp90aa1 PE=1 SV=3	1	1	1	1	1	1	1	84.814	733	733	0	8.4809	5089600	3	TLVSVTK				42	59	TRUE	59	79;80;81	86;87;88	88			-1
P62804	P62804	2	2	2	Histone H4;Osteogenic growth peptide	Hist1h4b	sp|P62804|H4_RAT Histone H4 OS=Rattus norvegicus OX=10116 GN=H4c16 PE=1 SV=2	1	2	2	2	19.4	19.4	19.4	11.367	103	103	0	25.007	10886000	2	DNIQGITKPAIR;VFLENVIR				38	2;63	True;True	2;63	3;85	3;93	3;93			-1
P13383	P13383	1	1	1	Nucleolin	Ncl	sp|P13383|NUCL_RAT Nucleolin OS=Rattus norvegicus OX=10116 GN=Ncl PE=1 SV=3	1	1	1	1	1	1	1	77.146	713	713	0	8.7465	5821700	2	VFGNEIK				21	62	TRUE	62	84	91;92	91			-1
P16290;P25113	P16290;P25113	1;1	1;1	1;1	Phosphoglycerate mutase 2;Phosphoglycerate mutase 1	Pgam2;Pgam1	sp|P16290|PGAM2_RAT Phosphoglycerate mutase 2 OS=Rattus norvegicus OX=10116 GN=Pgam2 PE=1 SV=2;sp|P25113|PGAM1_RAT Phosphoglycerate mutase 1 OS=Rattus norvegicus OX=10116 GN=Pgam1 PE=1 SV=4	2	1	1	1	4.3	4.3	4.3	28.755	253	253;254	0	6.4337	20840000	2	VLIAAHGNSLR				23	69	TRUE	69	93;94	101;102	101			-1;-1
Q8K4T4	Q8K4T4	1	1	1	Filamin-A-interacting protein 1	Filip1	sp|Q8K4T4|FLIP1_RAT Filamin-A-interacting protein 1 OS=Rattus norvegicus OX=10116 GN=Filip1 PE=1 SV=1	1	1	1	1	0.6	0.6	0.6	137.75	1212	1212	0	5.7167	0	2	LVGLSQR				60	39	TRUE	39	52;53	57;58	57			-1
P62718	P62718	1	1	1	60S ribosomal protein L18a	Rpl18a	sp|P62718|RL18A_RAT 60S ribosomal protein L18a OS=Rattus norvegicus OX=10116 GN=Rpl18a PE=2 SV=1	1	1	1	1	5.7	5.7	5.7	20.732	176	176	0	9.2457	17880000	1	IFAPNHVVAK				37	16	TRUE	16	26	28	28			-1
P61314	P61314	1	1	1	60S ribosomal protein L15	Rpl15	sp|P61314|RL15_RAT 60S ribosomal protein L15 OS=Rattus norvegicus OX=10116 GN=Rpl15 PE=1 SV=2	1	1	1	1	4.4	4.4	4.4	24.146	204	204	0	7.7914	0	1	SLQSVAEER				33	52	TRUE	52	72	79	79			-1
Q09073;Q05962	Q09073;Q05962	1;1	1;1	1;1	ADP/ATP translocase 2;ADP/ATP translocase 2, N-terminally processed;ADP/ATP translocase 1	Slc25a5;Slc25a4	sp|Q09073|ADT2_RAT ADP/ATP translocase 2 OS=Rattus norvegicus OX=10116 GN=Slc25a5 PE=1 SV=3;sp|Q05962|ADT1_RAT ADP/ATP translocase 1 OS=Rattus norvegicus OX=10116 GN=Slc25a4 PE=1 SV=3	2	1	1	1	3.4	3.4	3.4	32.901	298	298;298	0	7.2643	0	1	LLLQVQHASK				45	33	TRUE	33	44	49	49			-1;-1
Q8CGX0	Q8CGX0	1	1	1	Insulin-like growth factor 2 mRNA-binding protein 1	Igf2bp1	sp|Q8CGX0|IF2B1_RAT Insulin-like growth factor 2 mRNA-binding protein 1 OS=Rattus norvegicus OX=10116 GN=Igf2bp1 PE=1 SV=1	1	1	1	1	1.7	1.7	1.7	63.436	577	577	0	7.2113	0	1	ILAHNNFVGR				59	21	TRUE	21	31	36	36			-1
Q00715;Q00729	Q00715;Q00729	1;1	1;1	1;1	Histone H2B type 1;Histone H2B type 1-A	Hist1h2ba	sp|Q00715|H2B1_RAT Histone H2B type 1 OS=Rattus norvegicus OX=10116 PE=1 SV=2;sp|Q00729|H2B1A_RAT Histone H2B type 1-A OS=Rattus norvegicus OX=10116 GN=H2bc1 PE=1 SV=2	2	1	1	1	7.2	7.2	7.2	13.99	125	125;127	0	6.8341	0	1	LLLPGELAK				44	32	TRUE	32	43	48	48			-1;-1
P61980	P61980	1	1	1	Heterogeneous nuclear ribonucleoprotein K	Hnrnpk	sp|P61980|HNRPK_RAT Heterogeneous nuclear ribonucleoprotein K OS=Rattus norvegicus OX=10116 GN=Hnrnpk PE=1 SV=1	1	1	1	1	2.2	2.2	2.2	50.976	463	463	0	6.578	3176000	1	VVLIGGKPDR				34	76	TRUE	76	104;105	114;115	115			-1
P17078	P17078	1	1	1	60S ribosomal protein L35	Rpl35	sp|P17078|RL35_RAT 60S ribosomal protein L35 OS=Rattus norvegicus OX=10116 GN=Rpl35 PE=1 SV=3	1	1	1	1	8.1	8.1	8.1	14.552	123	123	0	6.4724	5630900	1	VLTVINQTQK				25	71	TRUE	71	97	106	106			-1
P04764	P04764	1	1	1	Alpha-enolase	Eno1	sp|P04764|ENOA_RAT Alpha-enolase OS=Rattus norvegicus OX=10116 GN=Eno1 PE=1 SV=4	1	1	1	1	2.1	2.1	2.1	47.127	434	434	0	6.3627	20480000	1	TIAPALVSK				11	58	TRUE	58	78	85	85			-1
Q5U216;Q63413	Q5U216;Q63413	1;1	1;1	1;1	ATP-dependent RNA helicase DDX39A;Spliceosome RNA helicase Ddx39b	Ddx39a;Ddx39b	sp|Q5U216|DX39A_RAT ATP-dependent RNA helicase DDX39A OS=Rattus norvegicus OX=10116 GN=Ddx39a PE=2 SV=1;sp|Q63413|DX39B_RAT Spliceosome RNA helicase Ddx39b OS=Rattus norvegicus OX=10116 GN=Ddx39b PE=2 SV=3	2	1	1	1	1.9	1.9	1.9	49.109	427	427;428	0	6.2559	2764400	1	ILNDVQDR				49	23	TRUE	23	33	38	38			-1;-1
D4A3K5;P15865	D4A3K5;P15865	1;1	1;1	1;1	Histone H1.1;Histone H1.4	Hist1h1a;Hist1h1e	sp|D4A3K5|H11_RAT Histone H1.1 OS=Rattus norvegicus OX=10116 GN=H1-1 PE=1 SV=1;sp|P15865|H14_RAT Histone H1.4 OS=Rattus norvegicus OX=10116 GN=H1-4 PE=1 SV=3	2	1	1	1	4.7	4.7	4.7	22.004	214	214;219	0	6.0424	925930	1	SGVSLAALKK				5	50	TRUE	50	70	77	77			-1;-1
P62909	P62909	1	1	1	40S ribosomal protein S3	Rps3	sp|P62909|RS3_RAT 40S ribosomal protein S3 OS=Rattus norvegicus OX=10116 GN=Rps3 PE=1 SV=1	1	1	1	1	3.3	3.3	3.3	26.674	243	243	0	6.032	1871600	1	ELTAVVQK				39	9	TRUE	9	12	14	14			-1
P04797;Q9ESV6	P04797;Q9ESV6	1;1	1;1	1;1	Glyceraldehyde-3-phosphate dehydrogenase;Glyceraldehyde-3-phosphate dehydrogenase, testis-specific	Gapdh;Gapdhs	sp|P04797|G3P_RAT Glyceraldehyde-3-phosphate dehydrogenase OS=Rattus norvegicus OX=10116 GN=Gapdh PE=1 SV=3;sp|Q9ESV6|G3PT_RAT Glyceraldehyde-3-phosphate dehydrogenase, testis-specific OS=Rattus norvegicus OX=10116 GN=Gapdhs PE=1 SV=1	2	1	1	1	2.1	2.1	2.1	35.828	333	333;432	0	5.9127	1673800	1	LTGMAFR				12	38	TRUE	38	51	56	56	0	229	-1;-1
D3ZKX9	D3ZKX9	1	1	1	Hydroperoxide isomerase ALOXE3	Aloxe3	sp|D3ZKX9|LOXE3_RAT Hydroperoxide isomerase ALOXE3 OS=Rattus norvegicus OX=10116 GN=Aloxe3 PE=1 SV=1	1	1	1	1	1	1	1	80.439	711	711	0	5.8279	0	1	VTSIGRR				4	75	TRUE	75	103	113	113			-1
O55156	O55156	1	1	1	CAP-Gly domain-containing linker protein 2	Clip2	sp|O55156|CLIP2_RAT CAP-Gly domain-containing linker protein 2 OS=Rattus norvegicus OX=10116 GN=Clip2 PE=1 SV=1	1	1	1	1	0.8	0.8	0.8	115.48	1046	1046	0	5.8161	327800	1	LTGLDKEK				9	37	TRUE	37	49;50	54;55	54			-1
Q5M868	Q5M868	1	1	1	Non-lysosomal glucosylceramidase	Gba2	sp|Q5M868|GBA2_RAT Non-lysosomal glucosylceramidase OS=Rattus norvegicus OX=10116 GN=Gba2 PE=2 SV=2	1	1	1	1	1.5	1.5	1.5	102.75	912	912	0	5.7954	0	1	SVMSDQCAGQWFLR				48	55	TRUE	55	75	82	82			-1
P05065	P05065	1	1	1	Fructose-bisphosphate aldolase A	Aldoa	sp|P05065|ALDOA_RAT Fructose-bisphosphate aldolase A OS=Rattus norvegicus OX=10116 GN=Aldoa PE=1 SV=2	1	1	1	1	3.8	3.8	3.8	39.351	364	364	0	5.7683	706300	1	LQSIGTENTEENRR				13	36	TRUE	36	48	53	53			-1
Q76HN1	Q76HN1	1	1	1	Hyaluronidase-1	Hyal1	sp|Q76HN1|HYAL1_RAT Hyaluronidase-1 OS=Rattus norvegicus OX=10116 GN=Hyal1 PE=2 SV=1	1	1	1	1	3.6	3.6	3.6	50.644	449	449	0	5.7573	0	1	DPHVPIMPYVQIFYEK				58	4	TRUE	4	5	6	6			-1
P41123	P41123	1	1	1	60S ribosomal protein L13	Rpl13	sp|P41123|RL13_RAT 60S ribosomal protein L13 OS=Rattus norvegicus OX=10116 GN=Rpl13 PE=1 SV=2	1	1	1	1	5.2	5.2	5.2	24.309	211	211	0	5.7549	1958000	1	PASGPIRPIVR				28	43	TRUE	43	60	65	65			-1
Q3MIE0	Q3MIE0	1	1	1	Enoyl-CoA hydratase domain-containing protein 3, mitochondrial	Echdc3	sp|Q3MIE0|ECHD3_RAT Enoyl-CoA hydratase domain-containing protein 3, mitochondrial OS=Rattus norvegicus OX=10116 GN=Echdc3 PE=2 SV=1	1	1	1	1	5.7	5.7	5.7	32.385	300	300	0	5.7454	0	1	SPWAPLSAGFCSPGSAR				46	53	TRUE	53	73	80	80			-1
P13234	P13234	1	1	1	Calcium/calmodulin-dependent protein kinase type IV	Camk4	sp|P13234|KCC4_RAT Calcium/calmodulin-dependent protein kinase type IV OS=Rattus norvegicus OX=10116 GN=Camk4 PE=1 SV=3	1	1	1	1	3.6	3.6	3.6	53.151	474	474	0	5.7444	0	1	QILEAVAYLHENGIVHR				20	46	TRUE	46	63	68	68			-1
D3ZFJ3	D3ZFJ3	1	1	1		Sh3bp1	sp|D3ZFJ3|3BP1_RAT SH3 domain-binding protein 1 OS=Rattus norvegicus OX=10116 GN=Sh3bp1 PE=1 SV=1	1	1	1	1	2.5	2.5	2.5	74.851	689	689	0	5.7444	0	1	APTVPPPLPPAPPQPAR				3	1	TRUE	1	2	2	2			-1
Q9WVT0	Q9WVT0	1	1	1	Probable G-protein coupled receptor 116	Gpr116	sp|Q9WVT0|AGRF5_RAT Adhesion G protein-coupled receptor F5 OS=Rattus norvegicus OX=10116 GN=Adgrf5 PE=1 SV=1	1	1	1	1	0.9	0.9	0.9	149.44	1349	1349	0	5.7351	110840	1	PSVGDKPGKQEK				63	45	TRUE	45	62	67	67			-1
Q712G6	Q712G6	1	1	1		Fut7	sp|Q712G6|FUT7_RAT Alpha-(1,3)-fucosyltransferase 7 OS=Rattus norvegicus OX=10116 GN=Fut7 PE=1 SV=1	1	1	1	1	3.8	3.8	3.8	42.958	370	370	0	5.7278	0	1	LEPFSGPTPPLPAK				57	28	TRUE	28	38	43	43			-1
P12839	P12839	1	1	1	Neurofilament medium polypeptide	Nefm	sp|P12839|NFM_RAT Neurofilament medium polypeptide OS=Rattus norvegicus OX=10116 GN=Nefm PE=1 SV=4	1	1	1	1	1.2	1.2	1.2	95.79	846	846	0	5.7188	494660	1	PQQQEKVKEK				19	44	TRUE	44	61	66	66			-1
Q68FR6	Q68FR6	1	1	1	Elongation factor 1-gamma	Eef1g	sp|Q68FR6|EF1G_RAT Elongation factor 1-gamma OS=Rattus norvegicus OX=10116 GN=Eef1g PE=2 SV=3	1	1	1	1	1.6	1.6	1.6	50.06	437	437	0	8.1245	3499500	0	TFLVGER				56	57	TRUE	57	77	84	84			-1
Q5XIM9	Q5XIM9	1	1	1	T-complex protein 1 subunit beta	Cct2	sp|Q5XIM9|TCPB_RAT T-complex protein 1 subunit beta OS=Rattus norvegicus OX=10116 GN=Cct2 PE=1 SV=3	1	1	1	1	1.3	1.3	1.3	57.458	535	535	0	7.47	1261300	0	ILLSSGR				50	22	TRUE	22	32	37	37			-1
P11240	P11240	1	1	1	Cytochrome c oxidase subunit 5A, mitochondrial	Cox5a	sp|P11240|COX5A_RAT Cytochrome c oxidase subunit 5A, mitochondrial OS=Rattus norvegicus OX=10116 GN=Cox5a PE=1 SV=1	1	1	1	1	4.8	4.8	4.8	16.129	146	146	0	7.1789	2113500	0	IIDAALR				17	19	TRUE	19	29	34	34			-1
M0R8U1	M0R8U1	1	1	1		Dnah5	sp|M0R8U1|DYH5_RAT Dynein axonemal heavy chain 5 (Fragment) OS=Rattus norvegicus OX=10116 GN=Dnah5 PE=1 SV=1	1	1	1	1	0.2	0.2	0.2	395.93	3470	3470	0	6.5664	506960	0	ERDIEQK				8	10	TRUE	10	13	15	15			-1
Q63722	Q63722	1	1	1	Protein jagged-1	Jag1	sp|Q63722|JAG1_RAT Protein jagged-1 OS=Rattus norvegicus OX=10116 GN=Jag1 PE=1 SV=2	1	1	1	1	0.6	0.6	0.6	134.33	1219	1219	0	6.5182	542180	0	VILDGAK				52	66	TRUE	66	88	96	96			-1
P67779	P67779	1	1	1	Prohibitin	Phb	sp|P67779|PHB1_RAT Prohibitin 1 OS=Rattus norvegicus OX=10116 GN=Phb1 PE=1 SV=1	1	1	1	1	3.3	3.3	3.3	29.82	272	272	0	6.2953	3197000	0	NVPVITGSK				41	42	TRUE	42	59	64	64			-1
Q5BJK8	Q5BJK8	1	1	1	Golgi integral membrane protein 4	Golim4	sp|Q5BJK8|GOLI4_RAT Golgi integral membrane protein 4 OS=Rattus norvegicus OX=10116 GN=Golim4 PE=1 SV=2	1	1	1	1	1.1	1.1	1.1	76.596	653	653	0	6.2515	1290000	0	LHGQLLR				47	30	TRUE	30	41	46	46			-1
P62630;P62632	P62630;P62632	1;1	1;1	1;1	Elongation factor 1-alpha 1;Elongation factor 1-alpha 2	Eef1a1;Eef1a2	sp|P62630|EF1A1_RAT Elongation factor 1-alpha 1 OS=Rattus norvegicus OX=10116 GN=Eef1a1 PE=2 SV=1;sp|P62632|EF1A2_RAT Elongation factor 1-alpha 2 OS=Rattus norvegicus OX=10116 GN=Eef1a2 PE=1 SV=1	2	1	1	1	1.7	1.7	1.7	50.113	462	462;463	0	6.2048	6764000	0	QLIVGVNK				36	47	TRUE	47	64	69	69			-1;-1
Q9JMJ4	Q9JMJ4	1	1	1	Pre-mRNA-processing factor 19	Prpf19	sp|Q9JMJ4|PRP19_RAT Pre-mRNA-processing factor 19 OS=Rattus norvegicus OX=10116 GN=Prpf19 PE=1 SV=2	1	1	1	1	1.4	1.4	1.4	55.238	504	504	0	6.1904	2241200	0	VIARLTK				62	65	TRUE	65	87	95	95			-1
F1MAD2	F1MAD2	1	1	1		Inadl	sp|F1MAD2|INADL_RAT InaD-like protein OS=Rattus norvegicus OX=10116 GN=Patj PE=1 SV=2	1	1	1	1	0.4	0.4	0.4	199.47	1836	1836	0	6.1721	1626700	0	VIPSVNNK				7	67	TRUE	67	89	97	97			-1
Q91Z80	Q91Z80	1	1	1	Liprin-alpha-4	Ppfia4	sp|Q91Z80|LIPA4_RAT Liprin-alpha-4 (Fragment) OS=Rattus norvegicus OX=10116 GN=Ppfia4 PE=1 SV=1	1	1	1	1	0.7	0.7	0.7	118	1043	1043	0	6.1224	846880	0	LLSPVSR				61	35	TRUE	35	46;47	51;52	52			-1
Q641X8	Q641X8	1	1	1	Eukaryotic translation initiation factor 3 subunit E	Eif3e	sp|Q641X8|EIF3E_RAT Eukaryotic translation initiation factor 3 subunit E OS=Rattus norvegicus OX=10116 GN=Eif3e PE=2 SV=1	1	1	1	1	1.8	1.8	1.8	52.22	445	445	0	6.0931	172620	0	VLVPATDR				53	72	TRUE	72	98	107	107			-1
Q9Z2J5	Q9Z2J5	1	1	1	Vesicle-associated membrane protein 5	Vamp5	sp|Q9Z2J5|VAMP5_RAT Vesicle-associated membrane protein 5 OS=Rattus norvegicus OX=10116 GN=Vamp5 PE=2 SV=1	1	1	1	1	6.9	6.9	6.9	11.495	102	102	0	6.0427	429160	0	VLERDGK				64	68	TRUE	68	90;91;92	98;99;100	98			-1
D4ABY2	D4ABY2	1	1	1	Coatomer subunit gamma-2	Copg2	sp|D4ABY2|COPG2_RAT Coatomer subunit gamma-2 OS=Rattus norvegicus OX=10116 GN=Copg2 PE=3 SV=2	1	1	1	1	1	1	1	80.488	715	715	0	6.0338	822520	0	IASRLLK				6	15	TRUE	15	25	27	27			-1
Q5YLM1	Q5YLM1	1	1	1	Sn1-specific diacylglycerol lipase alpha	Dagla	sp|Q5YLM1|DGLA_RAT Diacylglycerol lipase-alpha OS=Rattus norvegicus OX=10116 GN=Dagla PE=1 SV=1	1	1	1	1	0.7	0.7	0.7	115.3	1044	1044	0	6.0223	625740	0	IIVGATK				51	20	TRUE	20	30	35	35			-1
Q9Z2P3	Q9Z2P3	1	1	1	Tumor necrosis factor ligand superfamily member 4	Tnfsf4	sp|Q9Z2P3|TNFL4_RAT Tumor necrosis factor ligand superfamily member 4 OS=Rattus norvegicus OX=10116 GN=Tnfsf4 PE=2 SV=1	1	1	1	1	3.5	3.5	3.5	22.189	199	199	0	5.8466	900140	0	LVVSGIK				65	40	TRUE	40	54;55;56;57	59;60;61;62	59			-1
P54100	P54100	1	1	1	Proto-oncogene vav	Vav1	sp|P54100|VAV_RAT Proto-oncogene vav OS=Rattus norvegicus OX=10116 GN=Vav1 PE=2 SV=1	1	1	1	1	0.8	0.8	0.8	97.953	843	843	0	5.8461	1418100	0	ITSVERR				29	26	TRUE	26	36	41	41			-1
Q66H99	Q66H99	1	1	1	Nucleolar protein 10	Nol10	sp|Q66H99|NOL10_RAT Nucleolar protein 10 OS=Rattus norvegicus OX=10116 GN=Nol10 PE=2 SV=1	1	1	1	1	1.2	1.2	1.2	80.237	688	688	0	5.8207	4622400	0	VNKELALK				54	73	TRUE	73	99	108	108			-1
P21263	P21263	1	1	1	Nestin	Nes	sp|P21263|NEST_RAT Nestin OS=Rattus norvegicus OX=10116 GN=Nes PE=1 SV=2	1	1	1	1	0.5	0.5	0.5	208.79	1893	1893	0	5.7788	266270	0	SLLEDKTHK				27	51	TRUE	51	71	78	78			-1
P12001	P12001	1	1	1	60S ribosomal protein L18	Rpl18	sp|P12001|RL18_RAT 60S ribosomal protein L18 OS=Rattus norvegicus OX=10116 GN=Rpl18 PE=1 SV=2	1	1	1	1	5.3	5.3	5.3	21.658	188	188	0	5.7787	2108800	0	TNRPPLSLSR				18	60	TRUE	60	82	89	89			-1
P57756	P57756	1	1	1	Ficolin-2	Fcn2	sp|P57756|FCN2_RAT Ficolin-2 OS=Rattus norvegicus OX=10116 GN=Fcn2 PE=2 SV=1	1	1	1	1	6.3	6.3	6.3	34.683	319	319	0	5.76	591690	0	GVRGEKGDTGPSQSCATGPR				30	13	TRUE	13	16	18	18			-1
P06761	P06761	2	1	1	78 kDa glucose-regulated protein	Hspa5	sp|P06761|BIP_RAT Endoplasmic reticulum chaperone BiP OS=Rattus norvegicus OX=10116 GN=Hspa5 PE=1 SV=1	1	2	1	1	6.7	5	5	72.346	654	654	0	5.7507	431820	0	ELEEIVQPIISKLYGSGGPPPTGEEDTSEKDEL;VEIIANDQGNR				14	8;61	True;False	8;61	11;83	13;90	13;90			-1
B2GUV7	B2GUV7	1	1	1	Eukaryotic translation initiation factor 5B	Eif5b	sp|B2GUV7|IF2P_RAT Eukaryotic translation initiation factor 5B OS=Rattus norvegicus OX=10116 GN=Eif5b PE=1 SV=1	1	1	1	1	0.6	0.6	0.6	137.68	1216	1216	0	5.7414	564560	0	EKEELEK				2	7	TRUE	7	10	12	12			-1
Q66HR2	Q66HR2	1	1	1	Microtubule-associated protein RP/EB family member 1	Mapre1	sp|Q66HR2|MARE1_RAT Microtubule-associated protein RP/EB family member 1 OS=Rattus norvegicus OX=10116 GN=Mapre1 PE=1 SV=3	1	1	1	1	2.6	2.6	2.6	30.004	268	268	0	5.7359	1628700	0	ILQAGFK				55	24	TRUE	24	34	39	39			-1
P13803	P13803	1	1	1	Electron transfer flavoprotein subunit alpha, mitochondrial	Etfa	sp|P13803|ETFA_RAT Electron transfer flavoprotein subunit alpha, mitochondrial OS=Rattus norvegicus OX=10116 GN=Etfa PE=1 SV=4	1	1	1	1	2.7	2.7	2.7	34.951	333	333	0	5.7213	444880	0	NLLPRVAAK				22	41	TRUE	41	58	63	63			-1

## Sheet: VEGFR2
Protein IDs	Majority protein IDs	Peptide counts (all)	Peptide counts (razor+unique)	Peptide counts (unique)	Protein names	Gene names	Fasta headers	Number of proteins	Peptides	Razor + unique peptides	Unique peptides	Sequence coverage [%]	Unique + razor sequence coverage [%]	Unique sequence coverage [%]	Mol. weight [kDa]	Sequence length	Sequence lengths	Q-value	Score	Intensity	MS/MS count	Peptide sequences	Only identified by site	Reverse	Potential contaminant	id	Peptide IDs	Peptide is razor	Mod. peptide IDs	Evidence IDs	MS/MS IDs	Best MS/MS	Oxidation (M) site IDs	Oxidation (M) site positions	Taxonomy IDs
O08775;P35918	O08775;P35918	3;3	1;1	1;1	Vascular endothelial growth factor receptor 2	Kdr	sp|O08775|VGFR2_RAT Vascular endothelial growth factor receptor 2 OS=Rattus norvegicus OX=10116 GN=Kdr PE=1 SV=1;sp|P35918|VGFR2_MOUSE Vascular endothelial growth factor receptor 2 OS=Mus musculus OX=10090 GN=Kdr PE=1 SV=2	2	3	1	1	1.8	0.7	0.7	150.39	1343	1343;1345	0	6.0989	0	1	ALMSELK;CEAINKAGR;LVLNCTAR				0	0;1;2	False;True;False	0;1;2	0;1;2	0;1;2	0;1;2			-1;-1
P35968;P52583	P35968	3;1	3;1	1;0	Vascular endothelial growth factor receptor 2	KDR	sp|P35968|VGFR2_HUMAN Vascular endothelial growth factor receptor 2 OS=Homo sapiens OX=9606 GN=KDR PE=1 SV=2	2	3	3	1	1.6	1.6	0.5	151.53	1356	1356;1348	0	24.242	4366700	3	ALMSELK;LVLNCTAR;LVNRDLK				1	0;2;3	True;True;True	0;2;3	0;2;3	0;2;3	0;2;3			-1;-1
Q5GIT4	Q5GIT4	3	2	2	Vascular endothelial growth factor receptor 2	kdr	sp|Q5GIT4|VGFR2_DANRE Vascular endothelial growth factor receptor 2 OS=Danio rerio OX=7955 GN=kdr PE=1 SV=2	1	3	2	2	1.8	1.3	1.3	153.04	1357	1357	0	12.097	0	2	ALMSELK;SVNGSMSTSR;TPRMPNRR				2	0;4;5	False;True;True	0;4;5	0;4;5	0;4;5	0;4;5			-1
